# Supplementary material
Source: MDPI journal article supplement (https://www.mdpi.com/2079-9284/10/3/75)
Supplement: s1 [file s1]

**Supplementary Table 1.** The primer sequences used for RT-qPCR, (TNF $\alpha$ , IL-6, IL-8 and ACT).

| <b>Gene</b>  | <b>Forward primer</b>    | <b>Reverse Primer</b>    |
|--------------|--------------------------|--------------------------|
| TNF $\alpha$ | 5'-CTCACCCACACCATCAGC    | 5'-GAAGACCCCTCCCAGATAGA  |
| IL-6         | 5'-CCCCTGACCCAACCACAAAT  | 5'-ACTCCTTAAAGCTGCGCAGA  |
| IL-8         | 5'-AAACTTCTCCACAACCCTCTG | 5'-ATACTCCAAACCTTTCCACCC |
| ACT          | 5'-CCATGCCCACCATCACGC    | 5'-CACAGAGCCTCGCCTTTG    |
